# Supplementary material for: Chronic immune checkpoint inhibitor pneumonitis
Source: PubMed Central journal article supplement — J Immunother Cancer. 2020 Jun 17;8(1):e000840. doi: 10.1136/jitc-2020-000840 (PMC7304886; doi:10.1136/jitc-2020-000840), 2020-06-17

## Supplemental Figure 1: Bronchoalveolar Lavage Fluid Cell Features in Patients with Chronic Immune Checkpoint Inhibitor Pneumonitis

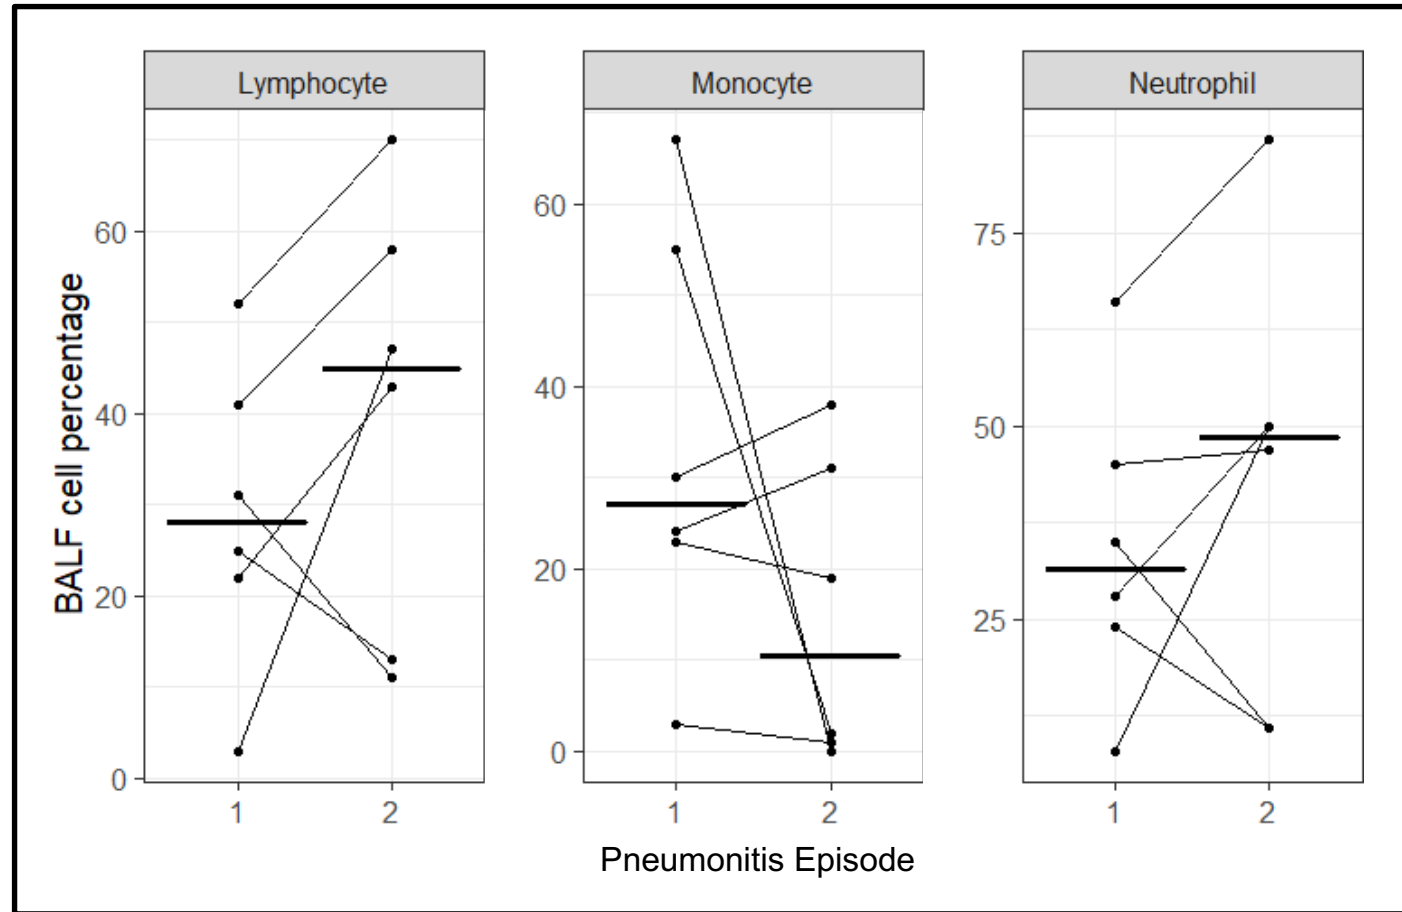

**Supplemental Figure 2: Chronic pneumonitis is associated with brisk lymphocytic inflammation, including highly proliferative PD-1+ CD8+ T cells**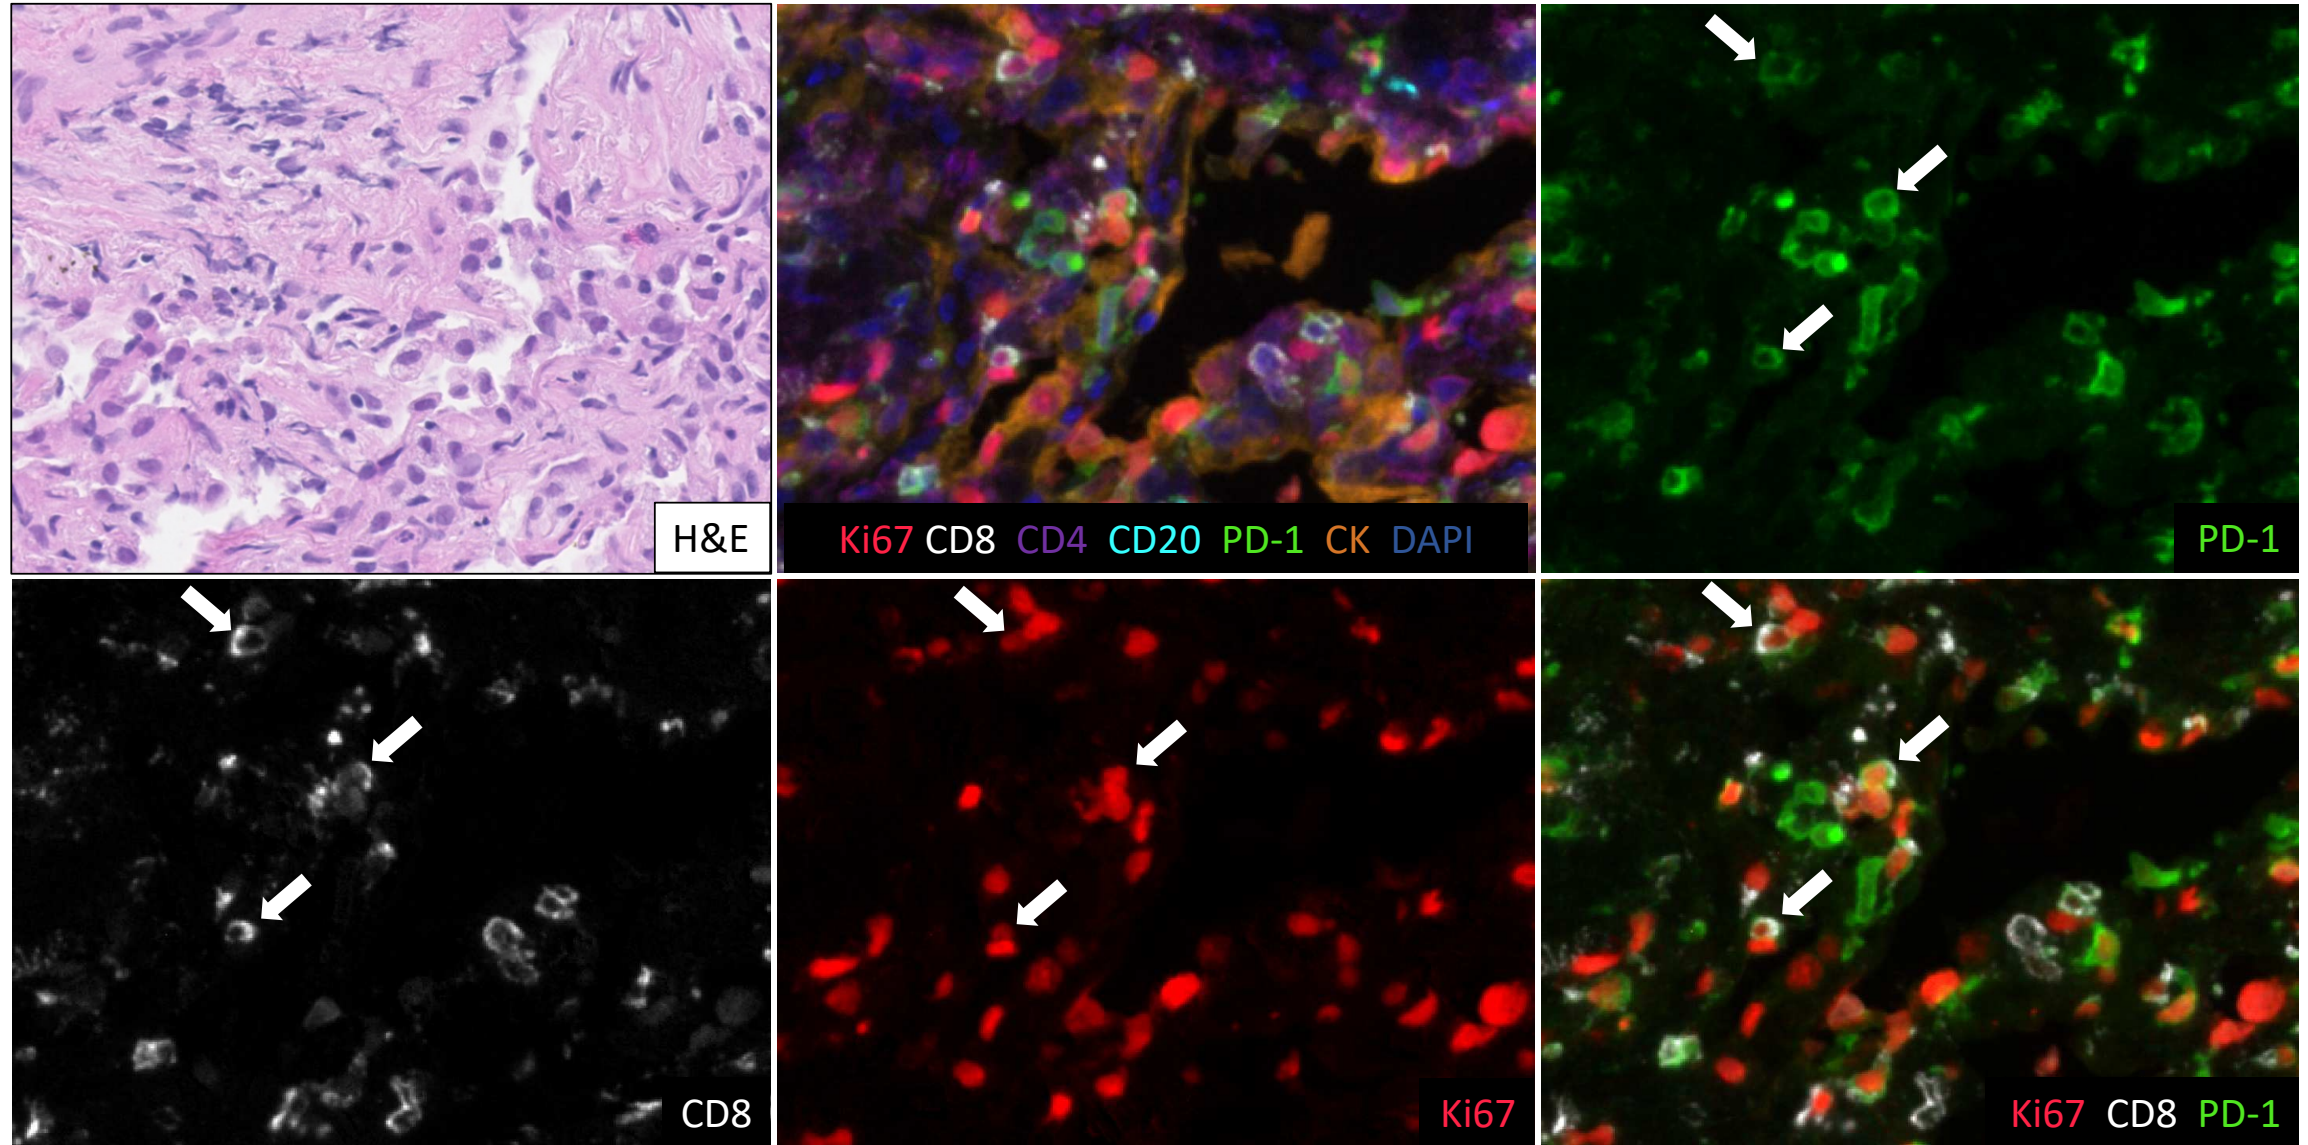

## Supplemental Figure 3: Spaghetti Plots of Corticosteroid Use in Individual Patients with Chronic Immune Checkpoint Inhibitor Pneumonitis

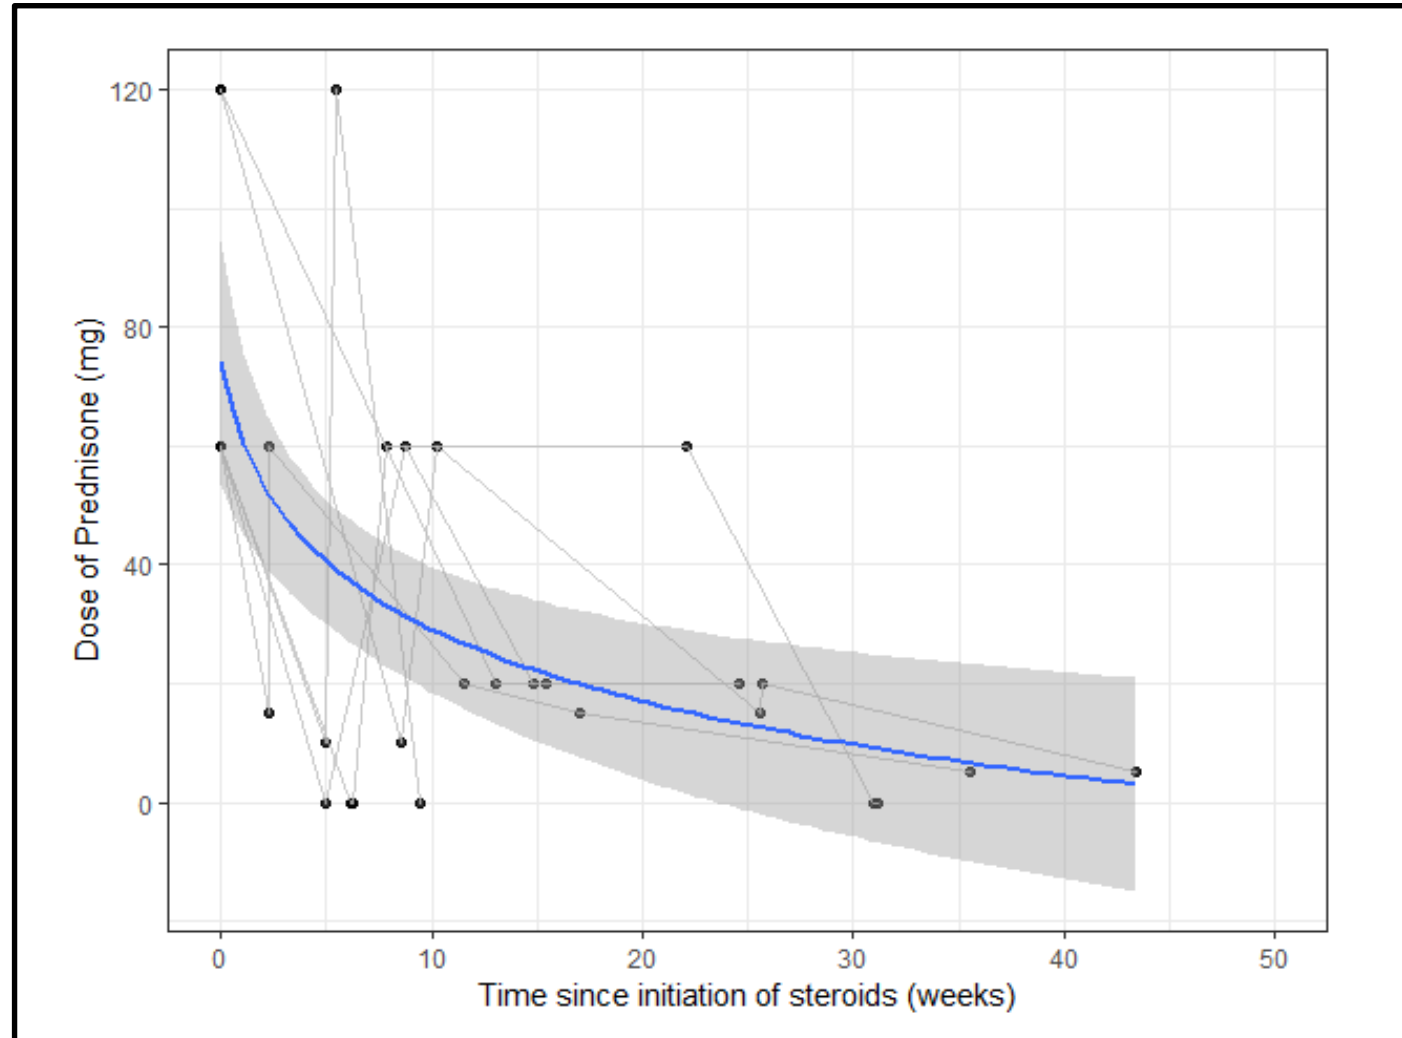

Supplement: jitc-2020-000840supp002.pdf [file jitc-2020-000840supp002.pdf]
